# Supplementary material for: Three-Dimensional Printing of Drug-Eluting Implantable PLGA Scaffolds for Bone Regeneration
Source: MDPI journal article supplement (doi:10.3390/bioengineering11030259), 2024-03-06
Supplement: s1 [file s1]

# Three-Dimensional Printing of Drug-Eluting Implantable PLGA Scaffolds for Bone Regeneration

Manjusha Annaji <sup>1</sup>, Nur Mita <sup>1,2</sup>, Ishwor Poudel <sup>1</sup>, Sai H. S. Boddu <sup>3,4</sup>, Oladiran Fasina <sup>5</sup> and R. Jayachandra Babu <sup>1,\*</sup>

<sup>1</sup> Department of Drug Discovery and Development, Harrison College of Pharmacy, Auburn University, Auburn, AL 36849, USA; mza0153@auburn.edu (M.A.); nzm0076@auburn.edu or mita@farmasi.unmul.ac.id (N.M.); izp0018@auburn.edu (I.P.)

<sup>2</sup> Faculty of Pharmacy, Mulawarman University, Samarinda, Kalimantan Timur 75119, Indonesia

<sup>3</sup> Department of Pharmaceutical Sciences, College of Pharmacy and Health Sciences, Ajman University, Ajman P.O. Box 346, United Arab Emirates; s.boddu@ajman.ac.ae

<sup>4</sup> Center of Medical and Bio-Allied Health Sciences Research, Ajman University, Ajman P.O. Box 346, United Arab Emirates

<sup>5</sup> Department of Biosystems Engineering, Samuel Ginn College of Engineering, Auburn University, Auburn, AL 36849, USA; fasinoo@auburn.edu

\* Correspondence: ramapjb@auburn.edu

**Table S1.** Solubility of ketoprofen in different pharmaceutical solvents at 25 °C (n = 3, mean ± SD).

| Solvent                         | Solubility of Ketoprofen (mg/mL) |
|---------------------------------|----------------------------------|
| PBS pH 7.4                      | 0.404 ± 0.21                     |
| Water                           | 0.135 ± 0.38                     |
| PBS pH 7.4: Ethanol (9:1% v/v)  | 0.405 ± 0.16                     |
| PBS pH 7.4: Ethanol (8:2% v/v)  | 0.415 ± 0.04                     |
| PBS pH 7.4: Methanol (9:1% v/v) | 0.399 ± 1.32                     |

**Table S2.** Physical properties of PLGA 50:50 polymer.

| Polymer    | Glass transition temperature (°C) | Tensile strength (MPa) | Elongation (%) | Modulus (Pa) | Biodegradation time (Months) |
|------------|-----------------------------------|------------------------|----------------|--------------|------------------------------|
| PLGA 50:50 | 30–45                             | 40–55                  | 3–10           | 140–280      | 1–2                          |

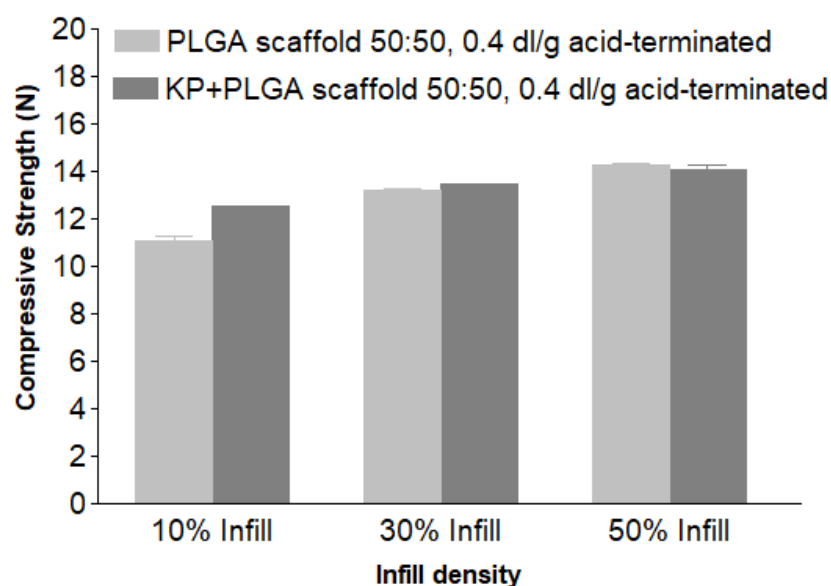

**Figure S1.** Compression strength of 3D printed PLGA and Ketoprofen + PLGA scaffolds printed with different infill densities (n = 3, mean  $\pm$  standard error of mean).

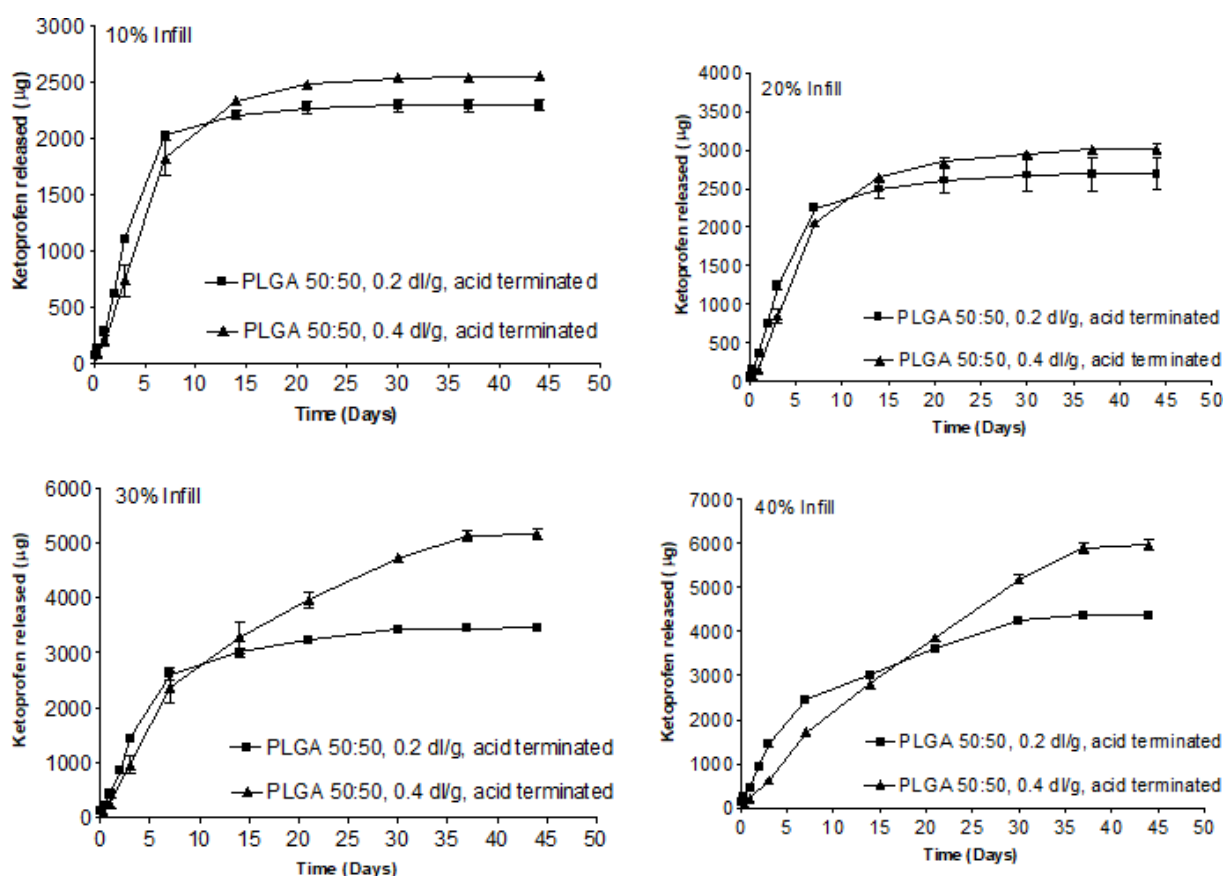

**Figure S2.** Comparison of in vitro release of ketoprofen (cumulative amount released) from discs printed with PLGA 0.2 dl/g and 0.4 dl/g and with different infill densities (n = 3, mean  $\pm$  standard error of mean (SEM)).

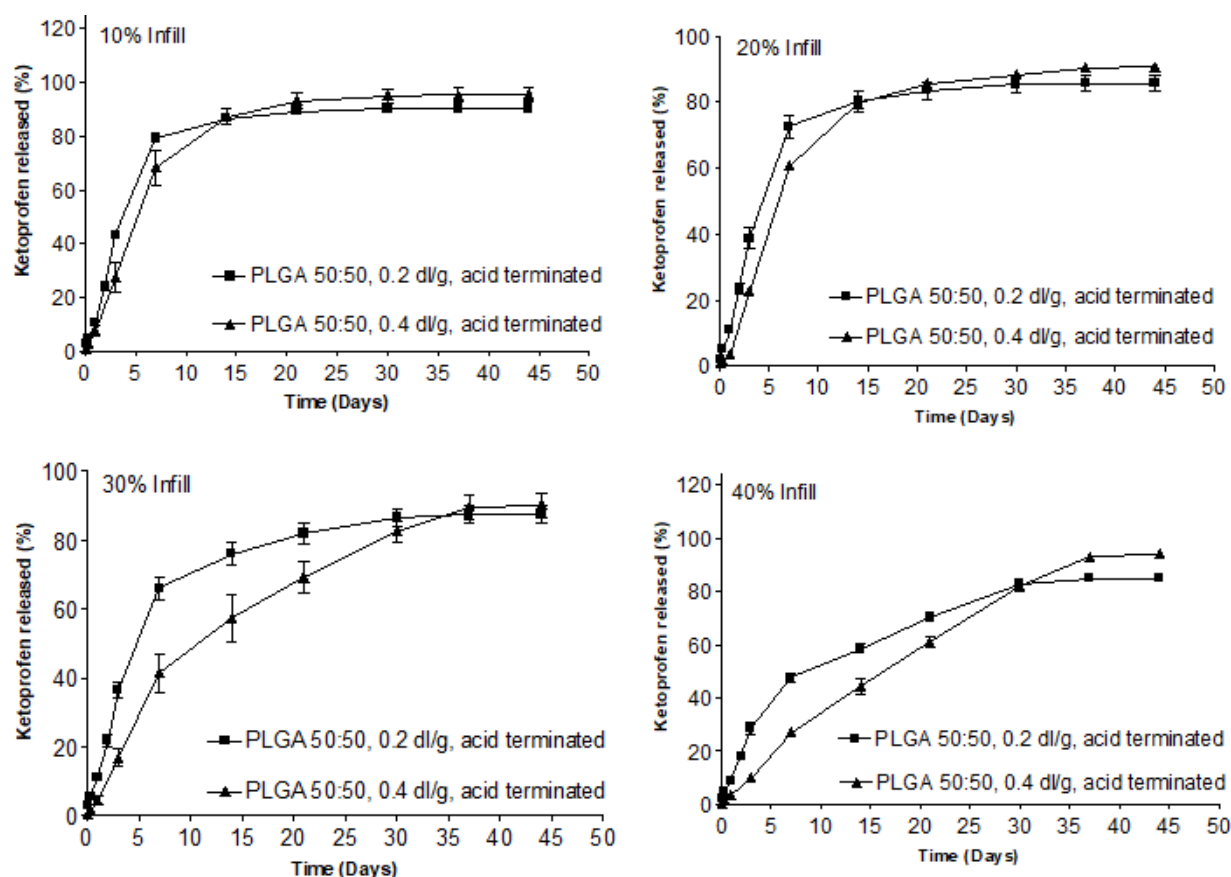

**Figure S3.** Comparison of in vitro release of ketoprofen (cumulative percent released) from discs printed with PLGA 0.2 dl/g and 0.4 dl/g and with different infill densities ( $n = 3$ , mean  $\pm$  standard error of mean (SEM)).

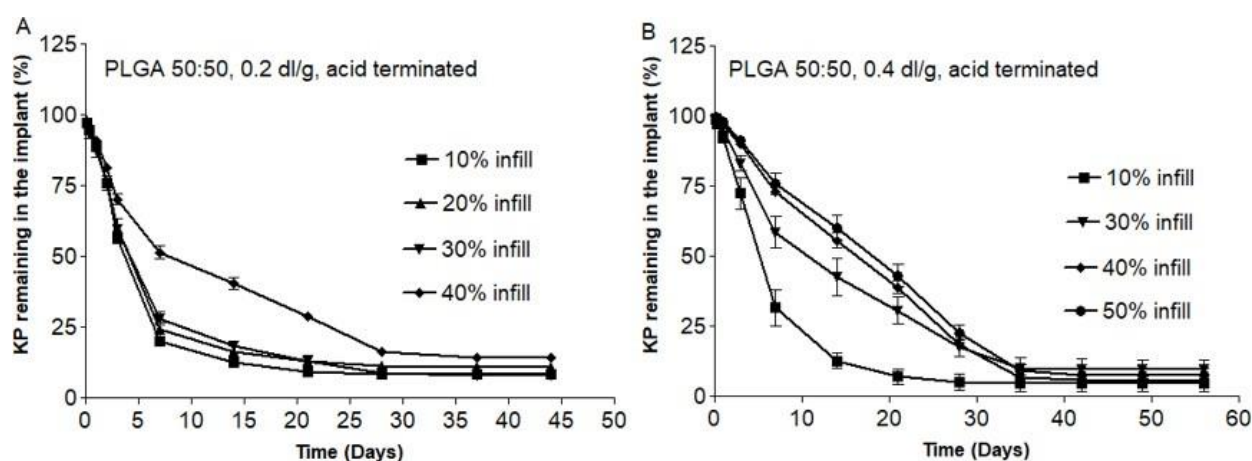

**Figure S4.** Cumulative percentage of ketoprofen remaining in the discs printed with different infill densities (A) PLGA 50:50, 0.2 dl/g, acid-terminated; (B) PLGA 50:50, 0.4 dl/g, acid-terminated ( $n = 3$ , mean  $\pm$  standard error of mean (SEM)).

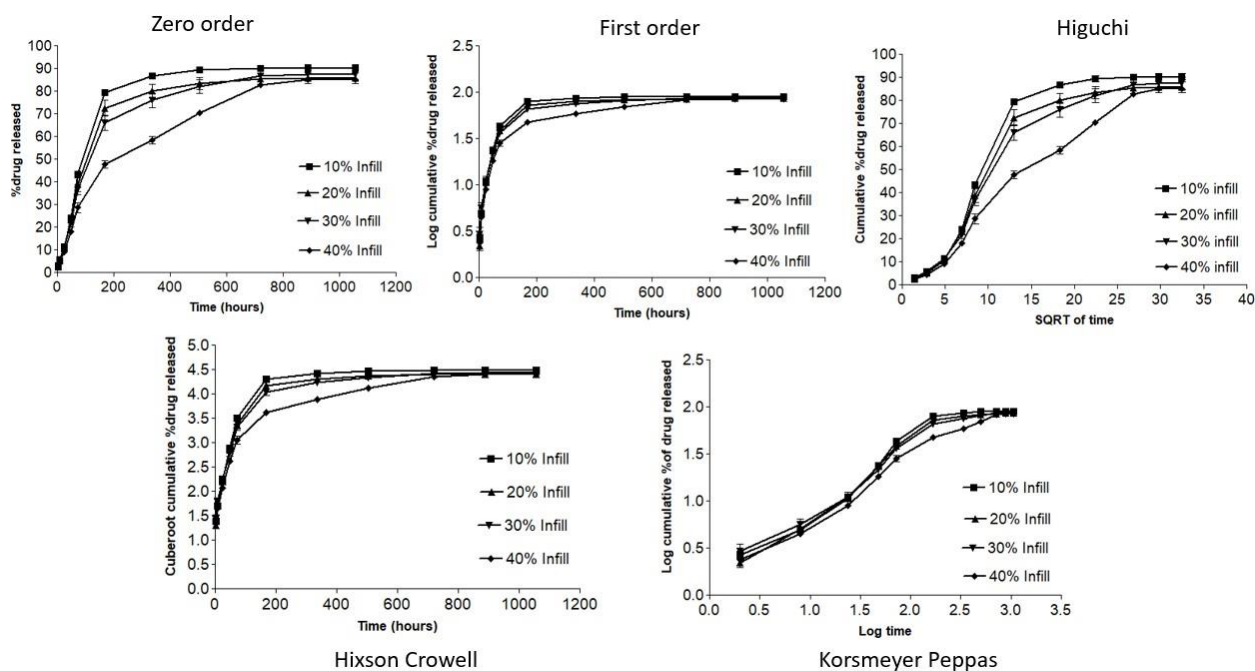

**Figure S5.** Various mathematical models for the in vitro release of ketoprofen from discs printed with PLGA 50:50, 0.2 dl/g, acid terminated polymer at different infill densities.

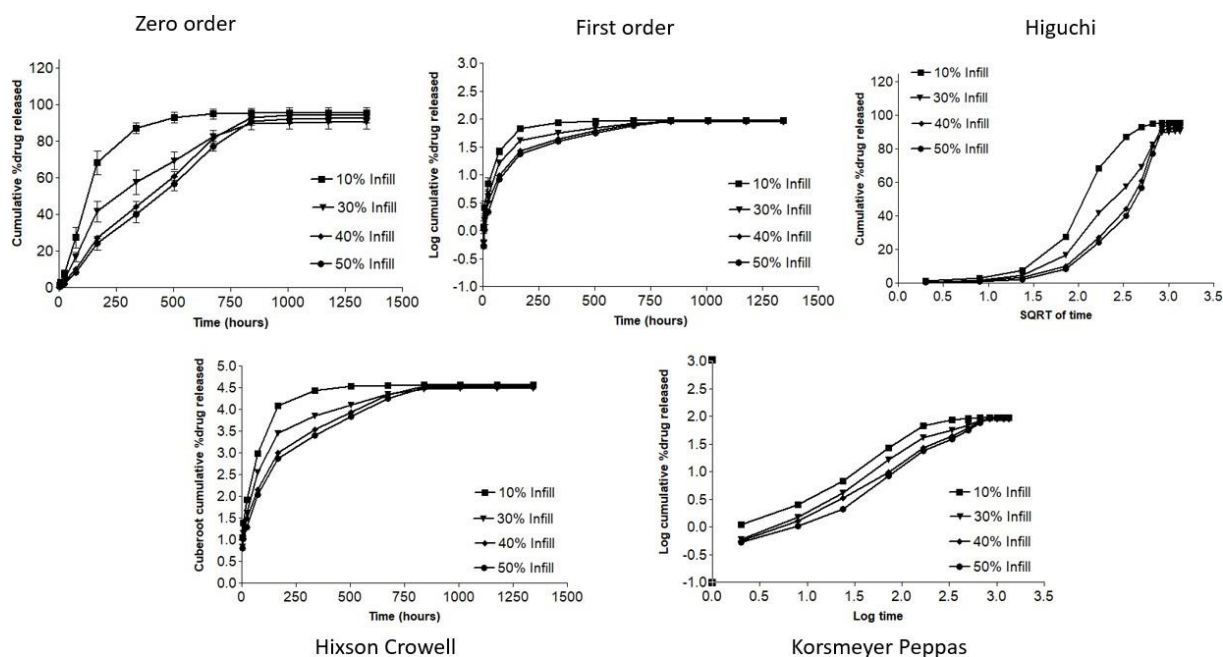

**Figure S6.** Various mathematical models for the in vitro release of ketoprofen from discs printed with PLGA 50:50, 0.4 dl/g, acid terminated polymer at different infill densities.
